# Supplementary material for: Effect of vanadium valence state on the solution chemistry and the stability of vanadium substituted polyoxometalates
Source: Royal Society of Chemistry journal article supplement (doi:10.1039/c6ra24432g), 2016-01-01
Supplement: c6ra24432g1.pdf [file c6ra24432g1.pdf]

Supporting Information

**Effect of vanadium valence state on the solution chemistry and the stability of vanadium substituted polyoxometaltes**

Chang Liu,<sup>†</sup> Jie Cao,<sup>\*,†</sup> Qian-Qian Wang,<sup>†</sup> and Jie-Chao Zang<sup>§</sup>, Cheng-Gang Ci<sup>\*,§</sup>

<sup>†</sup>Key Laboratory of Cluster Science, Ministry of Education of China; Beijing Key Laboratory of Photoelectronic/Electrophotonic Conversion Materials; School of Chemistry and Chemical Engineering, Beijing Institute of Technology, Beijing 100081, P. R. China

<sup>§</sup>Department of Chemistry and Chemical Engineering, Qiannan Normal University for Nationalities, Duyun 558000, P. R. China; Department of Chemistry, Northeast Normal University, Changchun 130024, P. R. China; Department of Chemistry and Chemical Engineering, Daqing Normal University, Daqing 163712, P. R. China.

\*Corresponding authors. E-mails: [jcao@bit.edu.cn](mailto:jcao@bit.edu.cn); [cicg100@nenu.edu.cn](mailto:cicg100@nenu.edu.cn). Tel./fax number: 0086-10-68912631

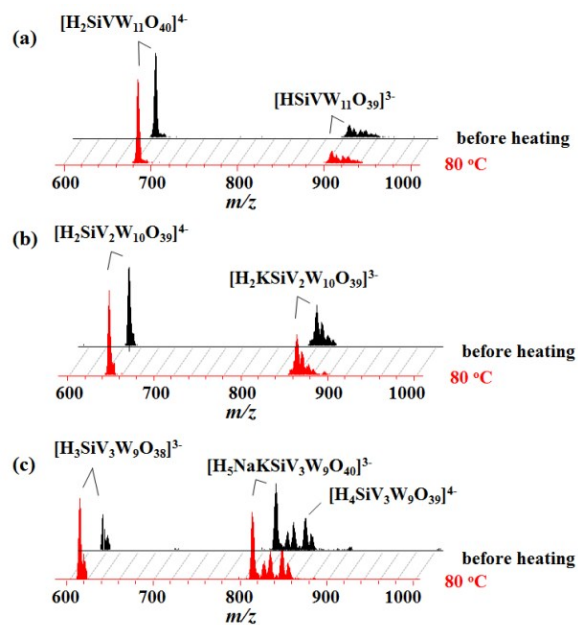

Fig. S1 ESI-MS monitoring of the reaction mixtures at  $80\text{ }^\circ\text{C}$ : (a) – (c) correspond to mixtures **1** - **3** with concentration of  $1.7 \times 10^{-2}\text{ M}$ .

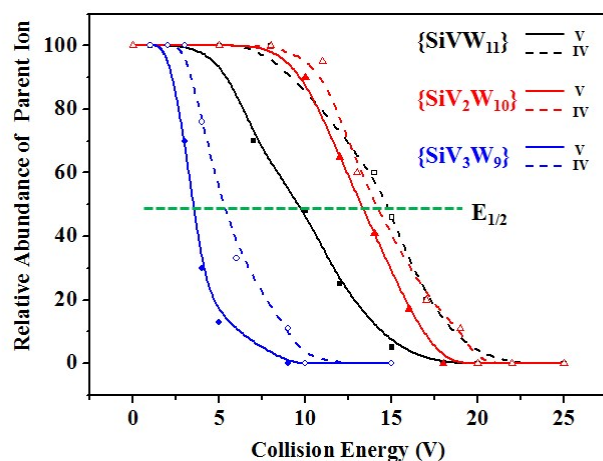

Fig. S2 Dissociation curves for the V-substituted POMs ( $\{\text{SiV}^{\text{V}}\text{W}_{11}\}$ , black line;  $\{\text{SiV}^{\text{V}_2}\text{W}_{10}\}$ , red line;  $\{\text{SiV}^{\text{V}_3}\text{W}_9\}$ , blue line). Solid and dotted lines represent  $\text{V}^{+5}$ - and  $\text{V}^{+4}$ -substituted POMs, respectively.

Table S1. Selected bond lengths (in Å) and free energies (in kcal mol<sup>-1</sup>) for a series of Keggin anions.

| Species                                                                         | V-O <sub>t</sub> | V-O <sub>b1</sub> | V-O <sub>b2</sub> | Si-O | $\Delta E^a$ | $\Delta G^a$ |
|---------------------------------------------------------------------------------|------------------|-------------------|-------------------|------|--------------|--------------|
| $\beta$ -[SiW <sub>11</sub> V(V)O <sub>40</sub> ] <sup>5-</sup>                 | 1.59             | 1.85              | 1.93              | 1.63 | 0.0          | 0.0          |
| $\beta$ -[SiW <sub>11</sub> V(IV)O <sub>40</sub> ] <sup>6-</sup>                | 1.60             | 1.99              | 1.98              | 1.64 | -104.9       | -105.8       |
| $\gamma$ -[SiW <sub>10</sub> V(V) <sub>2</sub> O <sub>40</sub> ] <sup>6-</sup>  | 1.60             | 1.82              | 1.93              | 1.63 | 0.0          | 0.0          |
| $\gamma$ -[SiW <sub>10</sub> V(IV) <sub>2</sub> O <sub>40</sub> ] <sup>8-</sup> | 1.61             | 1.84              | 1.90              | 1.63 | -134.1       | -134.0       |
| $\beta$ -[SiW <sub>9</sub> V(V) <sub>3</sub> O <sub>40</sub> ] <sup>7-</sup>    | 1.61             | 1.82              | 1.99              | 1.62 | 0.0          | 0.0          |
| $\beta$ -[SiW <sub>9</sub> V(IV) <sub>3</sub> O <sub>40</sub> ] <sup>10-</sup>  | 1.64             | 1.89              | 2.09              | 1.62 | -177.6       | -182.5       |

a.  $\Delta E$  and  $\Delta G$  are the relative energy of V(VI)-containing POM relative to the V(V)-containing POM.

Table S2. Cartesian coordinates and absolute energies for all mono-, di-, and tri-vanadium-substituted Keggin anions in water solution.

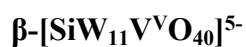

**E = -4119.2935145 a.u**

**G = -4119.229308 a.u**

|    |             |             |             |
|----|-------------|-------------|-------------|
| Si | -0.01396012 | 0.13815530  | 0.00000000  |
| W  | -2.41767628 | 2.10705945  | 1.67490433  |
| W  | -0.04933569 | 0.00218452  | -3.56737356 |
| W  | 2.58335446  | 1.88928667  | -1.65961471 |
| W  | -2.47405003 | -1.57503032 | 1.88599638  |
| W  | -0.04933569 | 0.00218452  | 3.56737356  |
| W  | -2.41767628 | 2.10705945  | -1.67490433 |
| W  | 0.69254043  | -2.82503750 | 1.84970823  |
| W  | 0.69254043  | -2.82503750 | -1.84970823 |
| W  | 2.58335446  | 1.88928667  | 1.65961471  |
| W  | 3.37440336  | -0.97873697 | 0.00000000  |
| W  | -2.47405003 | -1.57503032 | -1.88599638 |
| O  | -1.38658088 | 3.65610903  | -1.30582695 |
| O  | -3.34502680 | 2.38542948  | -0.00000000 |
| O  | -3.59453201 | 2.76050142  | 2.75170894  |
| O  | -1.07630943 | 1.49749471  | -2.91979352 |
| O  | -0.96596458 | 1.46469337  | -0.00000000 |
| O  | 1.17434943  | 3.02588391  | -1.30980262 |
| O  | 0.31553557  | 5.24478150  | 0.00000000  |
| O  | -2.99327355 | 0.23659881  | -1.59602038 |
| O  | 0.08229458  | 0.34336559  | -5.24959328 |
| O  | 0.74546601  | -1.75123969 | -3.47004457 |
| O  | -1.74083549 | -0.93423538 | -3.55339651 |
| O  | 1.52922543  | 0.82794841  | -2.89512344 |
| O  | -0.32756299 | -0.76456268 | -1.34630241 |
| O  | 3.73034742  | 0.27715778  | -1.36926268 |
| O  | 3.56518507  | 2.76420104  | -2.77567987 |
| O  | 1.57806829  | 0.55951785  | 0.00000000  |
| O  | -3.92806115 | -2.29979806 | 2.45674764  |
| O  | -1.74083549 | -0.93423538 | 3.55339651  |
| O  | -2.61668797 | -1.91829226 | 0.00000000  |
| O  | -1.22239322 | -3.03982471 | 2.09365111  |
| O  | -0.32756299 | -0.76456268 | 1.34630241  |
| O  | 0.08229458  | 0.34336559  | 5.24959328  |
| O  | 0.74546601  | -1.75123969 | 3.47004457  |

|   |             |             |             |
|---|-------------|-------------|-------------|
| O | 1.52922543  | 0.82794841  | 2.89512344  |
| O | -1.07630943 | 1.49749471  | 2.91979352  |
| O | -3.59453201 | 2.76050142  | -2.75170894 |
| O | 1.17434943  | 3.02588391  | 1.30980262  |
| O | 1.24847469  | -4.32404660 | 2.48831160  |
| O | 2.30388016  | -2.00034201 | 1.28644408  |
| O | 0.43312201  | -3.27703852 | 0.00000000  |
| O | 1.24847469  | -4.32404660 | -2.48831160 |
| O | 2.30388016  | -2.00034201 | -1.28644408 |
| O | -1.22239322 | -3.03982471 | -2.09365111 |
| O | 3.56518507  | 2.76420104  | 2.77567987  |
| O | 3.73034742  | 0.27715778  | 1.36926268  |
| O | 4.83515931  | -1.89129919 | 0.00000000  |
| O | -2.99327355 | 0.23659881  | 1.59602038  |
| O | -3.92806115 | -2.29979806 | -2.45674764 |
| O | -1.38658088 | 3.65610903  | 1.30582695  |
| O | 3.38321059  | 2.46781950  | 0.00000000  |
| V | -0.07651268 | 3.70572108  | 0.00000000  |

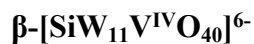

**E = -4119.4606667 a.u**

**G = -4119.397849 a.u**

|    |             |             |             |
|----|-------------|-------------|-------------|
| Si | -0.02258879 | 0.15451466  | -0.00000000 |
| W  | -2.50291401 | 2.06115693  | 1.66857920  |
| W  | -0.05811286 | -0.00175575 | -3.55507530 |
| W  | 2.52208843  | 1.98201528  | -1.66492088 |
| W  | -2.42085848 | -1.66071999 | 1.87798015  |
| W  | -0.05811286 | -0.00175575 | 3.55507530  |
| W  | -2.50291401 | 2.06115693  | -1.66857920 |
| W  | 0.79443007  | -2.80978242 | 1.85169552  |
| W  | 0.79443007  | -2.80978242 | -1.85169552 |
| W  | 2.52208843  | 1.98201528  | 1.66492088  |
| W  | 3.41829806  | -0.86981839 | -0.00000000 |
| W  | -2.42085848 | -1.66071999 | -1.87798015 |
| O  | -1.61043454 | 3.61755515  | -1.36251062 |
| O  | -3.47951530 | 2.19051785  | 0.00000000  |
| O  | -3.74384140 | 2.56424919  | 2.76492842  |
| O  | -1.14230144 | 1.43830027  | -2.92548716 |
| O  | -1.00805246 | 1.46222925  | 0.00000000  |
| O  | 1.11443111  | 3.09031340  | -1.37022745 |
| O  | 0.13248777  | 5.31787437  | -0.00000000 |
| O  | -2.98847156 | 0.08968144  | -1.58223284 |

|   |             |             |             |
|---|-------------|-------------|-------------|
| O | 0.06895222  | 0.34068648  | -5.24329891 |
| O | 0.81836523  | -1.72892218 | -3.46414274 |
| O | -1.69548229 | -1.03095943 | -3.56171162 |
| O | 1.50464694  | 0.86783690  | -2.89397528 |
| O | -0.30123422 | -0.77151852 | -1.34207012 |
| O | 3.72990672  | 0.38115836  | -1.36836796 |
| O | 3.51234391  | 2.85018927  | -2.78903852 |
| O | 1.55734102  | 0.62977446  | -0.00000000 |
| O | -3.84377825 | -2.45471018 | 2.45582851  |
| O | -1.69548229 | -1.03095943 | 3.56171162  |
| O | -2.53428927 | -2.06590360 | 0.00000000  |
| O | -1.09497873 | -3.09396228 | 2.09155568  |
| O | -0.30123422 | -0.77151852 | 1.34207012  |
| O | 0.06895222  | 0.34068648  | 5.24329891  |
| O | 0.81836523  | -1.72892218 | 3.46414274  |
| O | 1.50464694  | 0.86783690  | 2.89397528  |
| O | -1.14230144 | 1.43830027  | 2.92548716  |
| O | -3.74384140 | 2.56424919  | -2.76492842 |
| O | 1.11443111  | 3.09031340  | 1.37022745  |
| O | 1.41278568  | -4.28837695 | 2.49465879  |
| O | 2.37752828  | -1.93039946 | 1.28516648  |
| O | 0.56205433  | -3.28248142 | 0.00000000  |
| O | 1.41278568  | -4.28837695 | -2.49465879 |
| O | 2.37752828  | -1.93039946 | -1.28516648 |
| O | -1.09497873 | -3.09396228 | -2.09155568 |
| O | 3.51234391  | 2.85018927  | 2.78903852  |
| O | 3.72990672  | 0.38115836  | 1.36836796  |
| O | 4.90644683  | -1.74835132 | -0.00000000 |
| O | -2.98847156 | 0.08968144  | 1.58223284  |
| O | -3.84377825 | -2.45471018 | -2.45582851 |
| O | -1.61043454 | 3.61755515  | 1.36251062  |
| O | 3.32725944  | 2.56374179  | -0.00000000 |
| V | -0.16384270 | 3.74395319  | -0.00000000 |

$\gamma$ -[SiV<sub>2</sub>W<sub>10</sub>O<sub>40</sub>]<sup>6-</sup>

**E = -4122.8857249 a.u**

**G = -4122.823039 a.u**

|    |             |             |            |
|----|-------------|-------------|------------|
| Si | 0.00000000  | 0.00000000  | 0.19821789 |
| O  | 0.00000000  | 1.18572039  | 3.91169378 |
| O  | -0.00000000 | -1.18572039 | 3.91169378 |
| O  | 1.40174945  | -2.91529057 | 1.14209942 |
| O  | -1.40174945 | -2.91529057 | 1.14209942 |

|   |             |             |             |
|---|-------------|-------------|-------------|
| O | -1.40174945 | 2.91529057  | 1.14209942  |
| O | 1.40174945  | 2.91529057  | 1.14209942  |
| O | 0.00000000  | -2.04220869 | -3.17151581 |
| O | 0.00000000  | 2.04220869  | -3.17151581 |
| O | 2.80515622  | -2.45158724 | -3.43820622 |
| O | -2.80515622 | -2.45158724 | -3.43820622 |
| O | -2.80515622 | 2.45158724  | -3.43820622 |
| O | 2.80515622  | 2.45158724  | -3.43820622 |
| O | 1.27474400  | -3.58253589 | -1.40343300 |
| O | -1.27474400 | -3.58253589 | -1.40343300 |
| O | -1.27474400 | 3.58253589  | -1.40343300 |
| O | 1.27474400  | 3.58253589  | -1.40343300 |
| O | 2.80276130  | -1.60585815 | -0.71609191 |
| O | -2.80276130 | -1.60585815 | -0.71609191 |
| O | -2.80276130 | 1.60585815  | -0.71609191 |
| O | 2.80276130  | 1.60585815  | -0.71609191 |
| O | 1.74286680  | -0.00000000 | -2.61251137 |
| O | -1.74286680 | 0.00000000  | -2.61251137 |
| O | 2.51343187  | 1.31622851  | 3.06521719  |
| O | -2.51343187 | 1.31622851  | 3.06521719  |
| O | -2.51343187 | -1.31622851 | 3.06521719  |
| O | 2.51343187  | -1.31622851 | 3.06521719  |
| O | 4.21364551  | 2.75644004  | 1.43189751  |
| O | -4.21364551 | 2.75644004  | 1.43189751  |
| O | -4.21364551 | -2.75644004 | 1.43189751  |
| O | 4.21364551  | -2.75644004 | 1.43189751  |
| O | 0.00000000  | 5.27934319  | 0.47501222  |
| O | -0.00000000 | -5.27934319 | 0.47501222  |
| O | -3.89447487 | 0.00000000  | 1.16919980  |
| O | 3.89447487  | -0.00000000 | 1.16919980  |
| O | -1.35859884 | 0.00000000  | 1.09673011  |
| O | 1.35859884  | -0.00000000 | 1.09673011  |
| O | 0.00000000  | -1.36730609 | -0.74794004 |
| O | 0.00000000  | 1.36730609  | -0.74794004 |
| V | -1.38389794 | 0.00000000  | 3.91755548  |
| V | 1.38389794  | -0.00000000 | 3.91755548  |
| W | -2.89064240 | -1.65012882 | 1.28014111  |
| W | 2.89064240  | -1.65012882 | 1.28014111  |
| W | 2.89064240  | 1.65012882  | 1.28014111  |
| W | -2.89064240 | 1.65012882  | 1.28014111  |
| W | -1.70440925 | -1.88408659 | -2.23195060 |
| W | 1.70440925  | -1.88408659 | -2.23195060 |
| W | 1.70440925  | 1.88408659  | -2.23195060 |
| W | -1.70440925 | 1.88408659  | -2.23195060 |



|   |             |             |            |
|---|-------------|-------------|------------|
| W | 0.00000000  | 3.60612140  | 0.05099794 |
| W | -0.00000000 | -3.60612140 | 0.05099794 |
| O | -1.94032062 | 0.00000000  | 5.41669743 |
| O | 1.94032062  | -0.00000000 | 5.41669743 |

$\gamma$ -[SiV<sup>IV</sup><sub>2</sub>W<sub>10</sub>O<sub>40</sub>]<sup>8-</sup>

**E = -4123.099367 a.u**

**G = -4123.036639 a.u**

|    |             |             |             |
|----|-------------|-------------|-------------|
| Si | 0.00000000  | 0.00000000  | 0.16404409  |
| O  | 0.00000000  | 1.17410935  | 4.03295052  |
| O  | -0.00000000 | -1.17410935 | 4.03295052  |
| O  | 1.37469016  | -2.91880348 | 1.18260136  |
| O  | -1.37469016 | -2.91880348 | 1.18260136  |
| O  | -1.37469016 | 2.91880348  | 1.18260136  |
| O  | 1.37469016  | 2.91880348  | 1.18260136  |
| O  | 0.00000000  | -2.07449499 | -3.17599874 |
| O  | 0.00000000  | 2.07449499  | -3.17599874 |
| O  | 2.80555861  | -2.46415010 | -3.45524807 |
| O  | -2.80555861 | -2.46415010 | -3.45524807 |
| O  | -2.80555861 | 2.46415010  | -3.45524807 |
| O  | 2.80555861  | 2.46415010  | -3.45524807 |
| O  | 1.29611898  | -3.63527082 | -1.35324134 |
| O  | -1.29611898 | -3.63527082 | -1.35324134 |
| O  | -1.29611898 | 3.63527082  | -1.35324134 |
| O  | 1.29611898  | 3.63527082  | -1.35324134 |
| O  | 2.82043767  | -1.67037473 | -0.66854518 |
| O  | -2.82043767 | -1.67037473 | -0.66854518 |
| O  | -2.82043767 | 1.67037473  | -0.66854518 |
| O  | 2.82043767  | 1.67037473  | -0.66854518 |
| O  | 1.79066438  | -0.00000000 | -2.58868076 |
| O  | -1.79066438 | 0.00000000  | -2.58868076 |
| O  | 2.45163070  | 1.30962731  | 3.08289256  |
| O  | -2.45163070 | 1.30962731  | 3.08289256  |
| O  | -2.45163070 | -1.30962731 | 3.08289256  |
| O  | 2.45163070  | -1.30962731 | 3.08289256  |
| O  | 4.20866559  | 2.75296936  | 1.49400906  |
| O  | -4.20866559 | 2.75296936  | 1.49400906  |
| O  | -4.20866559 | -2.75296936 | 1.49400906  |
| O  | 4.20866559  | -2.75296936 | 1.49400906  |
| O  | 0.00000000  | 5.31845810  | 0.51284503  |
| O  | -0.00000000 | -5.31845810 | 0.51284503  |
| O  | -3.87726989 | 0.00000000  | 1.22599677  |

|   |             |             |             |
|---|-------------|-------------|-------------|
| O | 3.87726989  | -0.00000000 | 1.22599677  |
| O | -1.36358381 | 0.00000000  | 1.04905463  |
| O | 1.36358381  | -0.00000000 | 1.04905463  |
| O | 0.00000000  | -1.37283062 | -0.78052671 |
| O | 0.00000000  | 1.37283062  | -0.78052671 |
| V | -1.41256569 | 0.00000000  | 3.98030200  |
| V | 1.41256569  | -0.00000000 | 3.98030200  |
| W | -2.86741830 | -1.66128841 | 1.26573171  |
| W | 2.86741830  | -1.66128841 | 1.26573171  |
| W | 2.86741830  | 1.66128841  | 1.26573171  |
| W | -2.86741830 | 1.66128841  | 1.26573171  |
| W | -1.70010490 | -1.87870854 | -2.25050916 |
| W | 1.70010490  | -1.87870854 | -2.25050916 |
| W | 1.70010490  | 1.87870854  | -2.25050916 |
| W | -1.70010490 | 1.87870854  | -2.25050916 |
| W | 0.00000000  | 3.64646319  | 0.03442312  |
| W | -0.00000000 | -3.64646319 | 0.03442312  |
| O | -2.02793925 | 0.00000000  | 5.47248467  |
| O | 2.02793925  | -0.00000000 | 5.47248467  |

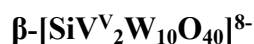

**E = -4122.8938594 a.u**

**G = -4122.829510 a.u**

|    |             |             |             |
|----|-------------|-------------|-------------|
| Si | -0.26817500 | 0.00355300  | 0.00000000  |
| V  | -3.41874000 | -0.12514400 | 1.58960300  |
| W  | -0.31824000 | -0.12801800 | -3.52406700 |
| W  | 0.66778200  | 2.99296200  | -1.67226300 |
| W  | -1.08253200 | -2.90069000 | 1.86820300  |
| W  | -0.31824000 | -0.12801800 | 3.52406700  |
| V  | -3.41874000 | -0.12514400 | -1.58960300 |
| W  | 2.14705700  | -1.82791600 | 1.88269900  |
| W  | 2.14705700  | -1.82791600 | -1.88269900 |
| W  | 0.66778200  | 2.99296200  | 1.67226300  |
| W  | 3.06340600  | 1.25370800  | 0.00000000  |
| W  | -1.08253200 | -2.90069000 | -1.86820300 |
| O  | -3.62704900 | 1.69236700  | -1.33814800 |
| O  | -4.21157000 | -0.48010800 | 0.00000000  |
| O  | -4.59882600 | -0.42572600 | 2.62242800  |
| O  | -1.97784800 | 0.30749100  | -2.88859600 |
| O  | -1.81714500 | 0.48854900  | 0.00000000  |
| O  | -1.21498900 | 2.95244800  | -1.32657400 |
| O  | -3.41956300 | 4.11845800  | 0.00000000  |

|   |             |             |             |
|---|-------------|-------------|-------------|
| O | -2.58550200 | -1.88578100 | -1.55862000 |
| O | -0.40241600 | 0.23045900  | -5.21609100 |
| O | 1.51548500  | -0.93756000 | -3.43761400 |
| O | -0.87157600 | -1.98067900 | -3.55908100 |
| O | 0.46602600  | 1.52813700  | -2.87640600 |
| O | 0.05460900  | -0.90617000 | -1.34076200 |
| O | 2.51894300  | 2.55634400  | -1.35992200 |
| O | 0.81696100  | 4.31050400  | -2.78016600 |
| O | 0.72397100  | 1.32948300  | 0.00000000  |
| O | -1.70315100 | -4.41045300 | 2.44448400  |
| O | -0.87157600 | -1.98067900 | 3.55908100  |
| O | -0.87815400 | -3.30680000 | 0.00000000  |
| O | 0.88247500  | -3.22603300 | 2.08353900  |
| O | 0.05460900  | -0.90617000 | 1.34076200  |
| O | -0.40241600 | 0.23045900  | 5.21609100  |
| O | 1.51548500  | -0.93756000 | 3.43761400  |
| O | 0.46602600  | 1.52813700  | 2.87640600  |
| O | -1.97784800 | 0.30749100  | 2.88859600  |
| O | -4.59882600 | -0.42572600 | -2.62242800 |
| O | -1.21498900 | 2.95244800  | 1.32657400  |
| O | 3.56766400  | -2.59413100 | 2.50129500  |
| O | 2.90503400  | -0.10334000 | 1.30809300  |
| O | 2.28787000  | -2.24262500 | 0.00000000  |
| O | 3.56766400  | -2.59413100 | -2.50129500 |
| O | 2.90503400  | -0.10334000 | -1.30809300 |
| O | 0.88247500  | -3.22603300 | -2.08353900 |
| O | 0.81696100  | 4.31050400  | 2.78016600  |
| O | 2.51894300  | 2.55634400  | 1.35992200  |
| O | 4.76487800  | 1.55644300  | 0.00000000  |
| O | -2.58550200 | -1.88578100 | 1.55862000  |
| O | -1.70315100 | -4.41045300 | -2.44448400 |
| O | -3.62704900 | 1.69236700  | 1.33814800  |
| O | 0.77973400  | 3.96304800  | 0.00000000  |
| W | -2.60447600 | 2.58941600  | 0.00000000  |

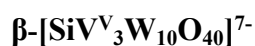

**E = -4126.4777396 a.u**

**G = -4126.412513 a.u**

|    |             |            |             |
|----|-------------|------------|-------------|
| Si | -0.00082877 | 0.41823777 | 0.00000000  |
| V  | 0.90548127  | 3.39272628 | -1.56686626 |
| W  | 0.12033899  | 0.39729877 | 3.53009064  |
| W  | -3.11598890 | 0.39806407 | 1.66098766  |

|   |             |             |             |
|---|-------------|-------------|-------------|
| W | 2.99682057  | 0.39559064  | -1.86907748 |
| W | 0.12033899  | 0.39729877  | -3.53009064 |
| V | 0.90548127  | 3.39272628  | 1.56686626  |
| W | 1.08000044  | -2.42731050 | -1.87359882 |
| W | 1.08000044  | -2.42731050 | 1.87359882  |
| W | -3.11598890 | 0.39806407  | -1.66098766 |
| W | -2.16434872 | -2.42445841 | 0.00000000  |
| W | 2.99682057  | 0.39559064  | 1.86907748  |
| O | -0.75181208 | 4.08330048  | 1.30730402  |
| O | 1.51211040  | 4.07975631  | -0.00000000 |
| O | 1.51816787  | 4.43745161  | -2.62198510 |
| O | 0.13415812  | 2.11078538  | 2.88731183  |
| O | -0.00079086 | 2.03458912  | 0.00000000  |
| O | -2.56023222 | 2.10874039  | 1.32615885  |
| O | -3.02784171 | 4.43384731  | 0.00000000  |
| O | 2.43269386  | 2.10791698  | 1.56046893  |
| O | -0.19014672 | 0.58315725  | 5.23014099  |
| O | 0.41771191  | -1.58221336 | 3.45109672  |
| O | 2.05843907  | 0.44269409  | 3.56742413  |
| O | -1.67444913 | 0.08247047  | 2.90141152  |
| O | 0.77534316  | -0.16663237 | 1.34306598  |
| O | -3.20119021 | -1.57963675 | 1.36182517  |
| O | -4.43309833 | 0.58760547  | 2.77945508  |
| O | -1.55382027 | -0.16311856 | 0.00000000  |
| O | 4.62391190  | 0.58177723  | -2.45137201 |
| O | 2.05843907  | 0.44269409  | -3.56742413 |
| O | 3.35284148  | 0.07932199  | -0.00000000 |
| O | 2.77758091  | -1.58228966 | -2.09192794 |
| O | 0.77534316  | -0.16663237 | -1.34306598 |
| O | -0.19014672 | 0.58315725  | -5.23014099 |
| O | 0.41771191  | -1.58221336 | -3.45109672 |
| O | -1.67444913 | 0.08247047  | -2.90141152 |
| O | 0.13415812  | 2.11078538  | -2.88731183 |
| O | 1.51816787  | 4.43745161  | 2.62198510  |
| O | -2.56023222 | 2.10874039  | -1.32615885 |
| O | 1.43815073  | -4.00600775 | -2.49831782 |
| O | -0.74946958 | -2.66973894 | -1.29527053 |
| O | 1.49486120  | -2.67829766 | -0.00000000 |
| O | 1.43815073  | -4.00600775 | 2.49831782  |
| O | -0.74946958 | -2.66973894 | 1.29527053  |
| O | 2.77758091  | -1.58228966 | 2.09192794  |
| O | -4.43309833 | 0.58760547  | -2.77945508 |
| O | -3.20119021 | -1.57963675 | -1.36182517 |
| O | -2.88433862 | -4.00317486 | 0.00000000  |

|   |             |            |             |
|---|-------------|------------|-------------|
| O | 2.43269386  | 2.10791698 | -1.56046893 |
| O | 4.62391190  | 0.58177723 | 2.45137201  |
| O | -0.75181208 | 4.08330048 | -1.30730402 |
| O | -4.11782498 | 0.44783883 | 0.00000000  |
| V | -1.80633799 | 3.39103634 | 0.00000000  |

**$\beta$ -[SiV<sup>VI</sup><sub>3</sub>W<sub>10</sub>O<sub>40</sub>]<sup>10-</sup>**

**E = -4126.7607258 a.u**

**G = -4126.703264 a.u**

|    |             |             |             |
|----|-------------|-------------|-------------|
| Si | -0.45694558 | -0.00189812 | -0.00000000 |
| V  | -3.50429359 | -0.90755382 | 1.55666418  |
| W  | -0.38989540 | -0.12366808 | -3.55363558 |
| W  | -0.40209323 | 3.12599563  | -1.67219197 |
| W  | -0.37797002 | -3.01535459 | 1.87370405  |
| W  | -0.38989540 | -0.12366808 | 3.55363558  |
| V  | -3.50429359 | -0.90755382 | -1.55666418 |
| W  | 2.44346098  | -1.08397890 | 1.86455915  |
| W  | 2.44346098  | -1.08397890 | -1.86455915 |
| W  | -0.40209323 | 3.12599563  | 1.67219197  |
| W  | 2.44217737  | 2.16914090  | -0.00000000 |
| W  | -0.37797002 | -3.01535459 | -1.87370405 |
| O  | -4.16772021 | 0.74538836  | -1.38481260 |
| O  | -4.17433905 | -1.56330308 | 0.00000000  |
| O  | -4.47681074 | -1.62277997 | 2.66933577  |
| O  | -2.09187452 | -0.10171490 | -2.96244429 |
| O  | -2.07865927 | 0.00190089  | -0.00000000 |
| O  | -2.10461366 | 2.61634651  | -1.38019673 |
| O  | -4.50391770 | 3.09491423  | -0.00000000 |
| O  | -2.07287378 | -2.47011061 | -1.57676369 |
| O  | -0.53898912 | 0.21092496  | -5.27308373 |
| O  | 1.59197866  | -0.39032708 | -3.46064813 |
| O  | -0.43780114 | -2.05952273 | -3.61082764 |
| O  | -0.07060458 | 1.70377894  | -2.92150505 |
| O  | 0.16290224  | -0.77876552 | -1.34230969 |
| O  | 1.59017681  | 3.22830785  | -1.35169584 |
| O  | -0.54731724 | 4.47241458  | -2.79327541 |
| O  | 0.14022012  | 1.56060196  | -0.00000000 |
| O  | -0.55596906 | -4.65617282 | 2.47880552  |
| O  | -0.43780114 | -2.05952273 | 3.61082764  |
| O  | -0.07336021 | -3.40543409 | 0.00000000  |
| O  | 1.57737355  | -2.80043729 | 2.11609257  |
| O  | 0.16290224  | -0.77876552 | 1.34230969  |

|   |             |             |             |
|---|-------------|-------------|-------------|
| O | -0.53898912 | 0.21092496  | 5.27308373  |
| O | 1.59197866  | -0.39032708 | 3.46064813  |
| O | -0.07060458 | 1.70377894  | 2.92150505  |
| O | -2.09187452 | -0.10171490 | 2.96244429  |
| O | -4.47681074 | -1.62277997 | -2.66933577 |
| O | -2.10461366 | 2.61634651  | 1.38019673  |
| O | 4.03691162  | -1.44837122 | 2.48709380  |
| O | 2.68586433  | 0.80906738  | 1.31953754  |
| O | 2.69582573  | -1.46347397 | 0.00000000  |
| O | 4.03691162  | -1.44837122 | -2.48709380 |
| O | 2.68586433  | 0.80906738  | -1.31953754 |
| O | 1.57737355  | -2.80043729 | -2.11609257 |
| O | -0.54731724 | 4.47241458  | 2.79327541  |
| O | 1.59017681  | 3.22830785  | 1.35169584  |
| O | 4.02969258  | 2.91278565  | -0.00000000 |
| O | -2.07287378 | -2.47011061 | 1.57676369  |
| O | -0.55596906 | -4.65617282 | -2.47880552 |
| O | -4.16772021 | 0.74538836  | 1.38481260  |
| O | -0.44272116 | 4.14209668  | -0.00000000 |
| V | -3.46246890 | 1.82805972  | -0.00000000 |

**[WO<sub>3</sub>(OH)]<sup>-</sup>**

**E = -369.6562143 a.u**

**G = -369.665834 a.u**

|   |             |             |             |
|---|-------------|-------------|-------------|
| W | -0.03492900 | 0.00036500  | 0.00000000  |
| O | -0.62453900 | -0.82883000 | 1.43231900  |
| O | -0.62453900 | 1.65478800  | 0.00000000  |
| O | 1.89973000  | 0.09310800  | 0.00000000  |
| H | 2.37587300  | -0.74889500 | 0.00000000  |
| O | -0.62453900 | -0.82883000 | -1.43231900 |

**[VO<sub>3</sub>(OH)]<sup>2-</sup>**

**E = -373.2286891 a.u**

**G = -373.236404 a.u**

|   |             |             |             |
|---|-------------|-------------|-------------|
| V | 0.09238300  | -0.00084800 | -0.00078000 |
| O | 0.59365200  | 0.84505100  | 1.35984700  |
| O | 0.71699600  | -1.55599300 | -0.02651100 |
| O | -1.78431400 | -0.21421200 | 0.05902700  |
| H | -2.22236200 | 0.64603600  | 0.02165800  |
| O | 0.48586100  | 0.84683700  | -1.39282800 |

Table S3. Cartesian coordinates and absolute energies for all mono-, di-, and tri-V<sup>5+</sup>-substituted Keggin anions in vacuum.

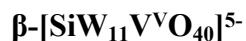

**E = -4118.22028 a.u**

**G = -4118.154721 a.u**

|    |             |             |             |
|----|-------------|-------------|-------------|
| Si | -0.00016000 | 0.01570800  | 0.13801500  |
| W  | -1.67788200 | 2.42568200  | 2.10792500  |
| W  | 3.57306400  | 0.03999900  | 0.00427500  |
| W  | 1.65640100  | -2.59032600 | 1.89690200  |
| W  | -1.88388000 | 2.48494400  | -1.57870800 |
| W  | -3.57362100 | 0.05531800  | 0.00205900  |
| W  | 1.68543800  | 2.41663200  | 2.11087500  |
| W  | -1.84958900 | -0.69096500 | -2.83443700 |
| W  | 1.84876400  | -0.69647900 | -2.83252100 |
| W  | -1.66864100 | -2.58469600 | 1.89506800  |
| W  | -0.00590800 | -3.38551800 | -0.98416000 |
| W  | 1.89718000  | 2.47778200  | -1.57607900 |
| O  | 1.30738200  | 1.37579500  | 3.65936900  |
| O  | 0.00583700  | 3.33681600  | 2.39538000  |
| O  | -2.74865500 | 3.60689300  | 2.78376300  |
| O  | 2.92348100  | 1.07180800  | 1.49855500  |
| O  | 0.00215100  | 0.96835600  | 1.46632500  |
| O  | 1.30509200  | -1.19177800 | 3.03396700  |
| O  | -0.00373700 | -0.30275700 | 5.27474500  |
| O  | 1.61384600  | 2.99212300  | 0.24308100  |
| O  | 5.26540500  | -0.10055500 | 0.33690500  |
| O  | 3.46679300  | -0.74782200 | -1.75128900 |
| O  | 3.56058700  | 1.73484500  | -0.93103600 |
| O  | 2.88886400  | -1.53094800 | 0.83026400  |
| O  | 1.34889100  | 0.33134800  | -0.76521200 |
| O  | 1.35997100  | -3.73345100 | 0.26548500  |
| O  | 2.77224700  | -3.58901200 | 2.76899500  |
| O  | -0.00139100 | -1.57953900 | 0.55837300  |
| O  | -2.46158300 | 3.94322600  | -2.31016600 |
| O  | -3.55106400 | 1.74949600  | -0.93428400 |
| O  | 0.00649800  | 2.62661500  | -1.90476100 |
| O  | -2.08979100 | 1.23309700  | -3.03660800 |
| O  | -1.34723100 | 0.33353200  | -0.76553100 |
| O  | -5.26734400 | -0.07678400 | 0.33133600  |

|   |             |             |             |
|---|-------------|-------------|-------------|
| O | -3.46847800 | -0.73363400 | -1.75324500 |
| O | -2.89699900 | -1.51696000 | 0.83147500  |
| O | -2.92347200 | 1.08818100  | 1.49694800  |
| O | 2.76213600  | 3.59281800  | 2.78637600  |
| O | -1.31130300 | -1.18851800 | 3.03371800  |
| O | -2.50104200 | -1.23547200 | -4.34209800 |
| O | -1.28762900 | -2.29691600 | -2.01683600 |
| O | 0.00029700  | -0.42235700 | -3.28222700 |
| O | 2.49977600  | -1.24355500 | -4.33944300 |
| O | 1.27793700  | -2.30154600 | -2.01560300 |
| O | 2.09861600  | 1.22597800  | -3.03578900 |
| O | -2.78972900 | -3.57886400 | 2.76534900  |
| O | -1.37808800 | -3.72582300 | 0.26276500  |
| O | -0.00836800 | -4.85506900 | -1.89824200 |
| O | -1.60199100 | 3.00033700  | 0.24172100  |
| O | 2.48146400  | 3.93435100  | -2.30570500 |
| O | -1.30533400 | 1.37978900  | 3.65712800  |
| O | -0.00777500 | -3.39599500 | 2.45512900  |
| V | -0.00286300 | 0.08173800  | 3.72723600  |



**E = -4121.3384489 a.u**

**G = -4121.273417 a.u**

|    |             |             |             |
|----|-------------|-------------|-------------|
| Si | -0.27060300 | 0.00323900  | 0.00000000  |
| V  | -3.45026000 | -0.12077300 | 1.59645700  |
| W  | -0.32760200 | -0.13200500 | -3.53766400 |
| W  | 0.66869700  | 3.00304400  | -1.68213300 |
| W  | -1.08579200 | -2.91319900 | 1.87138400  |
| W  | -0.32760200 | -0.13200500 | 3.53766400  |
| V  | -3.45026000 | -0.12077300 | -1.59645700 |
| W  | 2.16260100  | -1.83026400 | 1.89213100  |
| W  | 2.16260100  | -1.83026400 | -1.89213100 |
| W  | 0.66869700  | 3.00304400  | 1.68213300  |
| W  | 3.07638000  | 1.25278800  | 0.00000000  |
| W  | -1.08579200 | -2.91319900 | -1.87138400 |
| O  | -3.64539200 | 1.66951300  | -1.33182800 |
| O  | -4.21209000 | -0.50952700 | 0.00000000  |
| O  | -4.64897700 | -0.42837100 | 2.62070700  |
| O  | -1.98741600 | 0.28846200  | -2.90918900 |
| O  | -1.82263300 | 0.49039200  | 0.00000000  |
| O  | -1.23661300 | 2.95625900  | -1.32387000 |
| O  | -3.46781800 | 4.11311100  | 0.00000000  |



|   |             |             |             |
|---|-------------|-------------|-------------|
| O | -2.58350100 | -1.91026100 | -1.58411400 |
| O | -0.40121700 | 0.21800900  | -5.24422400 |
| O | 1.52743600  | -0.92272800 | -3.42841700 |
| O | -0.84643700 | -1.99118200 | -3.56602200 |
| O | 0.43986300  | 1.54050800  | -2.87692600 |
| O | 0.05115400  | -0.90737400 | -1.34462500 |
| O | 2.50314800  | 2.57995100  | -1.36100700 |
| O | 0.81496600  | 4.33910300  | -2.78815300 |
| O | 0.72519800  | 1.33250500  | 0.00000000  |
| O | -1.68365300 | -4.43895400 | 2.46684300  |
| O | -0.84643700 | -1.99118200 | 3.56602200  |
| O | -0.87321200 | -3.31216100 | 0.00000000  |
| O | 0.90699100  | -3.21982400 | 2.08336100  |
| O | 0.05115400  | -0.90737400 | 1.34462500  |
| O | -0.40121700 | 0.21800900  | 5.24422400  |
| O | 1.52743600  | -0.92272800 | 3.42841700  |
| O | 0.43986300  | 1.54050800  | 2.87692600  |
| O | -1.98741600 | 0.28846200  | 2.90918900  |
| O | -4.64897700 | -0.42837100 | -2.62070700 |
| O | -1.23661300 | 2.95625900  | 1.32387000  |
| O | 3.59425800  | -2.59424300 | 2.52249000  |
| O | 2.92480700  | -0.07872200 | 1.31005900  |
| O | 2.30807800  | -2.20949000 | 0.00000000  |
| O | 3.59425800  | -2.59424300 | -2.52249000 |
| O | 2.92480700  | -0.07872200 | -1.31005900 |
| O | 0.90699100  | -3.21982400 | -2.08336100 |
| O | 0.81496600  | 4.33910300  | 2.78815300  |
| O | 2.50314800  | 2.57995100  | 1.36100700  |
| O | 4.78244500  | 1.60130200  | 0.00000000  |
| O | -2.58350100 | -1.91026100 | 1.58411400  |
| O | -1.68365300 | -4.43895400 | -2.46684300 |
| O | -3.64539200 | 1.66951300  | 1.33182800  |
| O | 0.74436800  | 3.96616800  | 0.00000000  |
| W | -2.59658100 | 2.60191900  | 0.00000000  |

**$\beta$ -[SiV<sub>3</sub>W<sub>10</sub>O<sub>40</sub>]<sup>7-</sup>**

**E = -4124.349638 a.u**

**G = -4124.287976 a.u**

|    |             |             |             |
|----|-------------|-------------|-------------|
| Si | -0.42080000 | -0.00136800 | 0.00000000  |
| V  | -3.41163200 | 0.90687700  | -1.58013600 |
| W  | -0.40096300 | 0.12078300  | 3.54805000  |
| W  | -0.39786700 | -3.13260500 | 1.67006500  |

|   |             |             |             |
|---|-------------|-------------|-------------|
| W | -0.40392900 | 3.01242300  | -1.87759500 |
| W | -0.40096300 | 0.12078300  | -3.54805000 |
| V | -3.41163200 | 0.90687700  | 1.58013600  |
| W | 2.44341900  | 1.08690200  | -1.87853100 |
| W | 2.44341900  | 1.08690200  | 1.87853100  |
| W | -0.39786700 | -3.13260500 | -1.67006500 |
| W | 2.44448900  | -2.16678600 | 0.00000000  |
| W | -0.40392900 | 3.01242300  | 1.87759500  |
| O | -4.08283600 | -0.75787400 | 1.30404900  |
| O | -4.08429100 | 1.50189900  | 0.00000000  |
| O | -4.49730800 | 1.50806500  | -2.62039500 |
| O | -2.11467900 | 0.15047700  | 2.90932000  |
| O | -2.04220500 | -0.00379200 | 0.00000000  |
| O | -2.11116700 | -2.59273000 | 1.32252600  |
| O | -4.49005200 | -3.03444400 | 0.00000000  |
| O | -2.11526800 | 2.44108300  | 1.58412500  |
| O | -0.57455300 | -0.18114100 | 5.26808700  |
| O | 1.58311300  | 0.42046700  | 3.44755600  |
| O | -0.43535300 | 2.06269600  | 3.57366100  |
| O | -0.10291600 | -1.67484500 | 2.90084900  |
| O | 0.16083200  | 0.77841900  | 1.34807000  |
| O | 1.58509400  | -3.19590800 | 1.36077600  |
| O | -0.57358400 | -4.47198300 | 2.79052700  |
| O | 0.15974200  | -1.55964500 | 0.00000000  |
| O | -0.58013200 | 4.65213100  | -2.47785700 |
| O | -0.43535300 | 2.06269600  | -3.57366100 |
| O | -0.10549600 | 3.35296400  | 0.00000000  |
| O | 1.58161600  | 2.77745300  | -2.08721100 |
| O | 0.16083200  | 0.77841900  | -1.34807000 |
| O | -0.57455300 | -0.18114100 | -5.26808700 |
| O | 1.58311300  | 0.42046700  | -3.44755600 |
| O | -0.10291600 | -1.67484500 | -2.90084900 |
| O | -2.11467900 | 0.15047700  | -2.90932000 |
| O | -4.49730800 | 1.50806500  | 2.62039500  |
| O | -2.11116700 | -2.59273000 | -1.32252600 |
| O | 4.02864100  | 1.45992800  | -2.52514600 |
| O | 2.68008700  | -0.74465500 | -1.29259800 |
| O | 2.68379400  | 1.49509500  | 0.00000000  |
| O | 4.02864100  | 1.45992800  | 2.52514600  |
| O | 2.68008700  | -0.74465500 | 1.29259800  |
| O | 1.58161600  | 2.77745300  | 2.08721100  |
| O | -0.57358400 | -4.47198300 | -2.79052700 |
| O | 1.58509400  | -3.19590800 | -1.36077600 |
| O | 4.03059500  | -2.91123500 | 0.00000000  |

|   |             |             |             |
|---|-------------|-------------|-------------|
| O | -2.11526800 | 2.44108300  | -1.58412500 |
| O | -0.58013200 | 4.65213100  | 2.47785700  |
| O | -4.08283600 | -0.75787400 | -1.30404900 |
| O | -0.43294700 | -4.12649000 | 0.00000000  |
| V | -3.40617700 | -1.83155200 | 0.00000000  |

**[WO<sub>3</sub>(OH)]<sup>-</sup>**

**E = -369.5578756 a.u**

**G = -369.567152 a.u**

|   |             |             |             |
|---|-------------|-------------|-------------|
| W | 0.04384300  | -0.00255400 | -0.00000100 |
| O | 0.47886800  | 0.91671200  | 1.42954700  |
| O | 0.82317900  | -1.57144100 | -0.00004600 |
| O | -1.88695200 | -0.30308900 | 0.00011700  |
| H | -2.39404100 | 0.51801800  | 0.00023300  |
| O | 0.47860800  | 0.91668900  | -1.42964000 |

**[VO<sub>3</sub>(OH)]<sup>2-</sup>**

**E = -372.8763345 a.u**

**G = -372.885159 a.u**

|   |             |             |             |
|---|-------------|-------------|-------------|
| V | 0.11084000  | 0.00093500  | -0.00119600 |
| O | 0.43123100  | 0.88132700  | 1.39602700  |
| O | 0.94789900  | -1.45082300 | -0.05646100 |
| O | -1.78270800 | -0.43747500 | 0.03249500  |
| H | -2.16493800 | 0.45091000  | 0.01141200  |
| O | 0.35553000  | 0.94791900  | -1.37004900 |

Table S4. The pH values recorded before and during the solution reactions

| pH of reactant solutions ( $C_{\text{high}}/C_{\text{low}}$ ) |                                                                             |           | Reaction Time | pH of reaction mixtures                |                                          |
|---------------------------------------------------------------|-----------------------------------------------------------------------------|-----------|---------------|----------------------------------------|------------------------------------------|
|                                                               |                                                                             |           |               | $C_{\text{mix}}=5\times 10^{-4}$ mol/L | $C_{\text{mix}}=1.7\times 10^{-2}$ mol/L |
| 1                                                             | $\text{K}_8[\beta\text{-SiW}_{11}\text{O}_{39}]\cdot 14\text{H}_2\text{O}$  | 6.52/6.44 | 0 h           | 3.31                                   | 3.10                                     |
|                                                               |                                                                             |           | 1 h           | 3.23                                   | 3.01                                     |
|                                                               | 1 equiv $\text{VOSO}_4$                                                     | 2.61/3.20 | 2 h           | 3.15                                   | 2.93                                     |
|                                                               |                                                                             |           | 24 h          | 3.06                                   | 2.90                                     |
| 2                                                             | $\text{K}_8[\gamma\text{-SiW}_{10}\text{O}_{36}]\cdot 12\text{H}_2\text{O}$ | 7.01/6.91 | 0 h           | 4.04                                   | 3.91                                     |
|                                                               |                                                                             |           | 1 h           | 3.95                                   | 3.87                                     |
|                                                               | 2 equiv $\text{VOSO}_4$                                                     | 3.11/2.38 | 2 h           | 3.86                                   | 3.82                                     |
|                                                               |                                                                             |           | 24 h          | 3.80                                   | 3.77                                     |
| 3                                                             | $\text{Na}_9[\beta\text{-HSiW}_9\text{O}_{34}]\cdot 23\text{H}_2\text{O}$   | 9.02/8.89 | 0 h           | 6.92                                   | 6.42                                     |
|                                                               |                                                                             |           | 1 h           | 6.76                                   | 6.37                                     |
|                                                               | 3 equiv $\text{VOSO}_4$                                                     | 3.02/2.11 | 2 h           | 6.59                                   | 6.31                                     |
|                                                               |                                                                             |           | 24 h          | 6.50                                   | 6.22                                     |
